# Supplementary material for: Elevated expression of ZNF217 promotes prostate cancer growth by restraining ferroportin-conducted iron egress
Source: PubMed Central journal article supplement (PMC5356707; doi:10.18632/oncotarget.12753), 2016-10-19
Supplement: oncotarget-07-84893-s001.pdf [file oncotarget-07-84893-s001.pdf]

## Elevated expression of ZNF217 promotes prostate cancer growth by restraining ferroportin-conducted iron egress

### SUPPLEMENTARY TABLE

Supplementary Table 1: Primer list

| qRT-PCR   |         |                         |
|-----------|---------|-------------------------|
| GAPDH     | forward | GGAGCGAGATCCCTCCAAAAT   |
|           | reverse | GGCTGTTGTCATACTTCTCATGG |
| ZNF217    | forward | GTTGTTCCATTCCGAGCTACA   |
|           | reverse | GGTAGGCCGGTGTTCATTA     |
| FPN       | forward | CTACTTGGGGAGATCGGATGT   |
|           | reverse | CTGGGCCACTTTAAGTCTAGC   |
| EZH2      | forward | AATCAGAGTACATGCGACTGAGA |
|           | reverse | GCTGTATCCTTCGCTGTTTCC   |
| MAZ       | forward | ACCACCTGAACCGACACAAG    |
|           | reverse | AAGCTGCCTCACATTTCTCAC   |
| ChIP-qPCR |         |                         |
| ZNF217    | forward | GATAGCAGCCGCAGAAGA      |
|           | reverse | TCACAGCAGAGCCACATT      |
| MT1       | forward | CTTCTAACCCGCGAGCAA      |
|           | reverse | CACCCCGAATTACAAACAAA    |
| MT2       | forward | CTTCTAACCCGCGAGCAACGA   |
|           | reverse | AGGCGCAGATCCGGCCCTGT    |
| MT3       | forward | TGACAGCCTCCCGCCATCC     |
|           | reverse | CTACCGCCTCCTCCCCA       |
| MT4       | forward | AGGGAGGGCGCAACAGCT      |
|           | reverse | CACTCCCAGTTCTCGCTCGG    |
| MT5       | forward | TAAGCCGGATGGCGGGAGGA    |
|           | reverse | GGAGGCGCGGAGTTTCT       |
| MT6       | forward | CCGCCCTCCCCGCCCTC       |
|           | reverse | CCGGGTTTAATGAGGAGGA     |
